# Supplementary material
Source: Springer Nature journal article supplement (https://www.springermedizin.de/resource/supplementary/12936_2011_1972_MOESM2_ESM.pdf/9542148)
Supplement: MOESM2 [file 9542148]

```

      10      20      30      40      50      60
P. falciparum 3D7 C T C A A A G T G G T G C A A G T G C T C A A A G T G G T G C A A G T G C T C A A A G T G G T G C A A G T G C T C A A
Laos, K1 type 1 (n=135) *
Oudomxay, K1 type 2 (n=1)
Savannakhet, K1 type 3 (n=3)
Savannakhet, K1 type 4 (n=1)
Savannakhet, K1 type 5 (n=2)
Savannakhet, K1 type 6 (n=1)
Savannakhet, K1 type 7 (n=4)
Savannakhet, K1 type 8 (n=2)
Xekong, K1 type 9 (n=2)
Xekong, K1 type 10 (n=2)
Xekong, K1 type 11 (n=1)
Thailand, isolate T946
Thailand, isolate T9/102
Vietnam, isolate MSP1B144
Cambodia, isolate Cam84I-1
Myanmar, type 14
Myanmar, type 16
Indonesia, isolate 3/M1
India, isolate Su26
India, isolate Ke7
Malawi, isolate 1/014-2
Peru, isolate K1-195.18
Peru, isolate K1-170.9

```

```

      70      80      90      100      110      120
P. falciparum 3D7 G T G G T G C A A G T G C T C A A A G T G G T G C A A A G T G C T C A A A G T G G T A C A A G T G G T C C A A G T G G T C
Laos, K1 type 1 (n=135) *
Oudomxay, K1 type 2 (n=1)
Savannakhet, K1 type 3 (n=3)
Savannakhet, K1 type 4 (n=1)
Savannakhet, K1 type 5 (n=2)
Savannakhet, K1 type 6 (n=1)
Savannakhet, K1 type 7 (n=4)
Savannakhet, K1 type 8 (n=2)
Xekong, K1 type 9 (n=2)
Xekong, K1 type 10 (n=2)
Xekong, K1 type 11 (n=1)
Thailand, isolate T946
Thailand, isolate T9/102
Vietnam, isolate MSP1B144
Cambodia, isolate Cam84I-1
Myanmar, type 14
Myanmar, type 16
Indonesia, isolate 3/M1
India, isolate Su26
India, isolate Ke7
Malawi, isolate 1/014-2
Peru, isolate K1-195.18
Peru, isolate K1-170.9

```

```

      130      140      150
P. falciparum 3D7 C A A - G T G G T A C A A G T C C A T C A T C T C G T T C A A A -
Laos, K1 type 1 (n=135) *
Oudomxay, K1 type 2 (n=1)
Savannakhet, K1 type 3 (n=3)
Savannakhet, K1 type 4 (n=1)
Savannakhet, K1 type 5 (n=2)
Savannakhet, K1 type 6 (n=1)
Savannakhet, K1 type 7 (n=4)
Savannakhet, K1 type 8 (n=2)
Xekong, K1 type 9 (n=2)
Xekong, K1 type 10 (n=2)
Xekong, K1 type 11 (n=1)
Thailand, isolate T946
Thailand, isolate T9/102
Vietnam, isolate MSP1B144
Cambodia, isolate Cam84I-1
Myanmar, type 14
Myanmar, type 16
Indonesia, isolate 3/M1
India, isolate Su26
India, isolate Ke7
Malawi, isolate 1/014-2
Peru, isolate K1-195.18
Peru, isolate K1-170.9

```

\* 10 sequences of Laos, K1 type 1 derived from sequence analysis (2 from Oudomxay, 5 from Savannakhet and 3 from Xekong), 125 sequences were expected from SSCP screening.
